# Supplementary material for: Spontaneous viral clearance of hepatitis C virus (HCV) infection among people who inject drugs (PWID) and HIV-positive men who have sex with men (HIV+ MSM): a systematic review and meta-analysis
Source: Springer Nature journal article supplement (doi:10.1186/s12879-016-1807-5), 2016-09-05
Supplement: MOESM2 [file 10649750]

**Additional file 2. Fisher's exact tests for variables associated with spontaneous viral clearance among PWID.**

**Table 1. 2 x 2 table: The proportion of males and the proportion of HIV+ PWID.**

| Proportion (%) of males | Proportion (%) of HIV+ PWID |       | Total |
|-------------------------|-----------------------------|-------|-------|
|                         | 0-25                        | 26-50 |       |
| 0-50                    | 1                           | 0     | 1     |
| 51-100                  | 9                           | 3     | 12    |
| Total                   | 10                          | 3     | 13    |

Fisher's exact = 1.000

1-sided Fisher's exact = 0.769

**Table 2. 3 x 2 table: The proportion of males and the proportion of HIV+ PWID.**

| Proportion (%) of males | Proportion (%) of HIV+ PWID |       | Total |
|-------------------------|-----------------------------|-------|-------|
|                         | 0-25                        | 26-50 |       |
| 26-50                   | 1                           | 0     | 1     |
| 51-75                   | 7                           | 1     | 8     |
| 76-100                  | 2                           | 2     | 4     |
| Total                   | 10                          | 3     | 13    |

Fisher's exact = 0.413

**Table 3. 2 x 2 table: The proportion of males and age.**

| Proportion (%) of males | Age            |                | Total |
|-------------------------|----------------|----------------|-------|
|                         | Below 30 years | Above 30 years |       |
| 0-50                    | 0              | 1              | 1     |
| 51-100                  | 4              | 9              | 13    |
| Total                   | 4              | 10             | 14    |

Fisher's exact = 1.000

1-sided Fisher's exact = 0.714

**Table 4. 3 x 2 table: The proportion of males and age.**

| Proportion (%) of males | Age            |                | Total |
|-------------------------|----------------|----------------|-------|
|                         | Below 30 years | Above 30 years |       |
| 26-50                   | 0              | 1              | 1     |
| 51-75                   | 3              | 7              | 10    |
| 76-100                  | 1              | 2              | 3     |
| Total                   | 4              | 10             | 14    |

Fisher's exact = 1.000

0.413

**Table 5. 3 x 3 table: The proportion of males and age.**

| Proportion (%) of males | Age         |             |             | Total |
|-------------------------|-------------|-------------|-------------|-------|
|                         | 18-28 years | 29-39 years | 40-50 years |       |
| 26-50                   | 1           | 0           | 0           | 1     |
| 51-75                   | 7           | 3           | 0           | 10    |
| 76-100                  | 2           | 0           | 1           | 3     |
| Total                   | 10          | 3           | 1           | 14    |

Fisher's exact = 0.520
